# Supplementary material for: Quality of Antimalarials at the Epicenter of Antimalarial Drug Resistance: Results from an Overt and Mystery Client Survey in Cambodia
Source: PubMed Central journal article supplement (PMC4455075; doi:10.4269/ajtmh.14-0391), 2015-06-03
Supplement: SD3.pdf [file SD3.pdf]

SUPPLEMENTAL ANNEX TABLE 1  
Percentage API of ACAs collected by census survey

| Stated brand name                                                       | n   | 0-44%   | 45-54%  | 55-64%  | 65-74%   | 75-84%    | 85-94%    | 95-104%   | 105-114%  | 115-120% | >120%   | Mean  | SD    | Minimum | Maximum |
|-------------------------------------------------------------------------|-----|---------|---------|---------|----------|-----------|-----------|-----------|-----------|----------|---------|-------|-------|---------|---------|
|                                                                         |     | n (%)   | n (%)   | n (%)   | n (%)    | n (%)     | n (%)     | n (%)     | n (%)     | n (%)    | n (%)   |       |       |         |         |
| Artemidine                                                              | 1   | 0 (0)   | 0 (0)   | 0 (0)   | 1 (100)  | 0 (0)     | 0 (0)     | 0 (0)     | 0 (0)     | 0 (0)    | 0 (0)   | 74.1  | -     | -       | -       |
| Artemether                                                              | 18  | 0 (0)   | 0 (0)   | 0 (0)   | 2 (11.1) | 16 (88.9) | 0 (0)     | 0 (0)     | 0 (0)     | 0 (0)    | 0 (0)   | 79.2  | 3.47  | 69.6    | 83.6    |
| Artemether liquid injection (80 mg/mL)                                  | 15  | 0 (0)   | 0 (0)   | 0 (0)   | 0 (0)    | 0 (0)     | 0 (0)     | 15 (100)  | 0 (0)     | 0 (0)    | 0 (0)   | 98    | 1.76  | 95.7    | 101.4   |
| Artesiane 80 (80 mg/mL)                                                 | 1   | 1 (100) | 0 (0)   | 0 (0)   | 0 (0)    | 0 (0)     | 0 (0)     | 0 (0)     | 0 (0)     | 0 (0)    | 0 (0)   | 33.2  | -     | -       | -       |
| Cotecxin Dihydroartemisinin tablets (60 mg)                             | 11  | 0 (0)   | 0 (0)   | 0 (0)   | 0 (0)    | 6 (54.5)  | 4 (36.4)  | 1 (9.1)   | 0 (0)     | 0 (0)    | 0 (0)   | 86.7  | 5.19  | 80.2    | 97.5    |
| Artequick Co-blistered artemisinin 62.5 mg and piperazine 375 mg        | 2   | 0 (0)   | 0 (0)   | 0 (0)   | 0 (0)    | 1 (50.0)  | 0 (0)     | 1 (50.0)  | 0 (0)     | 0 (0)    | 0 (0)   | 90.1  | 7.82  | 84.6    | 95.7    |
| Arquine 50 Artesunate tablets (50 mg)                                   | 1   | 0 (0)   | 0 (0)   | 0 (0)   | 0 (0)    | 0 (0)     | 1 (100)   | 0 (0)     | 0 (0)     | 0 (0)    | 0 (0)   | 92.3  | -     | -       | -       |
| A + M1 Co-blistered artesunate 50 mg and mefloquine 250 mg              | 3   | 0 (0)   | 0 (0)   | 0 (0)   | 0 (0)    | 0 (0)     | 2 (66.7)  | 1 (33.3)  | 0 (0)     | 0 (0)    | 0 (0)   | 93.8  | 1.5   | 92.4    | 95.4    |
| A + M2 Co-blistered artesunate 50 mg and mefloquine 250 mg              | 1   | 0 (0)   | 0 (0)   | 0 (0)   | 0 (0)    | 0 (0)     | 1 (100)   | 0 (0)     | 0 (0)     | 0 (0)    | 0 (0)   | 94.6  | -     | -       | -       |
| A + M3 Co-blistered artesunate 50 mg and mefloquine 250 mg              | 4   | 0 (0)   | 0 (0)   | 0 (0)   | 0 (0)    | 0 (0)     | 3 (75.0)  | 1 (25.0)  | 0 (0)     | 0 (0)    | 0 (0)   | 94.7  | 1.73  | 93.5    | 97.2    |
| A + M4 Co-blistered artesunate 50 mg and mefloquine 250 mg              | 6   | 0 (0)   | 0 (0)   | 0 (0)   | 0 (0)    | 0 (0)     | 6 (100)   | 0 (0)     | 0 (0)     | 0 (0)    | 0 (0)   | 88.3  | 2.72  | 85.8    | 93.6    |
| A + M5 Co-blistered artesunate 50 mg and mefloquine 250 mg              | 11  | 0 (0)   | 0 (0)   | 0 (0)   | 2 (18.2) | 8 (72.7)  | 1 (9.1)   | 0 (0)     | 0 (0)     | 0 (0)    | 0 (0)   | 77.7  | 4.53  | 69.2    | 87.9    |
| Malarine adolescent Co-blistered artesunate 50 mg and mefloquine 250 mg | 116 | 0 (0)   | 2 (1.7) | 9 (7.8) | 6 (5.2)  | 8 (6.9)   | 31 (26.7) | 45 (38.8) | 12 (10.3) | 2 (1.7)  | 1 (0.9) | 92.1  | 14.62 | 50.3    | 122.9   |
| Malarine adult Co-blistered artesunate 50 mg and mefloquine 250 mg      | 8   | 0 (0)   | 0 (0)   | 0 (0)   | 0 (0)    | 0 (0)     | 1 (12.5)  | 5 (62.5)  | 2 (25.0)  | 0 (0)    | 0 (0)   | 95.9  | 2.6   | 92.2    | 98      |
| Malarine child Co-blistered artesunate 50 mg and mefloquine 250 mg      | 4   | 0 (0)   | 0 (0)   | 0 (0)   | 1 (25.0) | 1 (2.5)   | 1 (25.0)  | 0 (0)     | 1 (25.0)  | 0 (0)    | 0 (0)   | 88.8  | 15.18 | 73.8    | 108.8   |
| Malarine AS (Bindinh Pharma) Artesunate tablets (50 mg)                 | 4   | 0 (0)   | 0 (0)   | 0 (0)   | 0 (0)    | 0 (0)     | 1 (25.0)  | 3 (75.0)  | 0 (0)     | 0 (0)    | 0 (0)   | 95.9  | 2.6   | 92.2    | 98      |
| AS (Canada Pharm) Artesunate tablets (50 mg)                            | 1   | 0 (0)   | 0 (0)   | 0 (0)   | 0 (0)    | 0 (0)     | 1 (100)   | 0 (0)     | 0 (0)     | 0 (0)    | 0 (0)   | 93.2  | -     | -       | -       |
| A + M (unknown) Co-blistered artesunate 50 mg and mefloquine 250 mg     | 0   | 0 (0)   | 0 (0)   | 0 (0)   | 0 (0)    | 0 (0)     | 0 (0)     | 0 (0)     | 0 (0)     | 0 (0)    | 0 (0)   | -     | -     | -       | -       |
| AS (unknown) Artesunate tablets (50 mg)                                 | 3   | 0 (0)   | 0 (0)   | 0 (0)   | 0 (0)    | 0 (0)     | 1 (33.3)  | 2 (66.7)  | 0 (0)     | 0 (0)    | 0 (0)   | 97.4  | 3.55  | 93.9    | 101     |
| ArtesunAT Artesunate tablets (50 mg)                                    | 2   | 0 (0)   | 0 (0)   | 0 (0)   | 0 (0)    | 0 (0)     | 0 (0)     | 2 (100)   | 0 (0)     | 0 (0)    | 0 (0)   | 101.3 | 1.6   | 100.2   | 102.4   |

API = active pharmaceutical ingredient; ACAs = artemisinin-containing antimalarials; SD = standard deviation.

SUPPLEMENTAL ANNEX TABLE 2  
Percentage API of ACAs collected by MCs

| Stated brand name   | Stated API and formulation                             | n  | 0-44%    | 45-54% | 55-64%   | 65-74% | 75-84%   | 85-94%    | 95-104%  | 105-114% | 115-120% | >120%   | Mean  | SD    | Minimum | Maximum |
|---------------------|--------------------------------------------------------|----|----------|--------|----------|--------|----------|-----------|----------|----------|----------|---------|-------|-------|---------|---------|
|                     |                                                        |    | API      | API    | API      | API    | API      | API       | API      | API      | API      | API     |       |       |         |         |
| Artemether          | Artemether liquid injection (80 mg/mL)                 | 1  | 0 (0)    | 0 (0)  | 0 (0)    | 0 (0)  | 0 (0)    | 0 (0)     | 0 (0)    | 1 (100)  | 0 (0)    | 0 (0)   | 105.2 | -     | -       | -       |
| Artesiane 80        | Artemether liquid injection (80 mg/mL)                 | 1  | 0 (0)    | 0 (0)  | 0 (0)    | 0 (0)  | 0 (0)    | 0 (0)     | 1 (100)  | 0 (0)    | 0 (0)    | 0 (0)   | 103.9 | -     | -       | -       |
| Duo-cotecxin        | Dihydroartemisinin tablets (60 mg)                     | 3  | 0 (0)    | 0 (0)  | 0 (0)    | 0 (0)  | 0 (0)    | 0 (0)     | 1 (33.3) | 2 (66.7) | 0 (0)    | 0 (0)   | 104.7 | 4.16  | 100.0   | 108.0   |
| Artequick           | Co-blistered artemisinin 62.5 mg and piperazine 375 mg | 7  | 0 (0)    | 0 (0)  | 0 (0)    | 0 (0)  | 5 (71.4) | 2 (28.6)  | 0 (0)    | 0 (0)    | 0 (0)    | 0 (0)   | 83.2  | 3.96  | 78.5    | 90.4    |
| Arquine 50          | Artesunate tablets (50 mg)                             | 3  | 0 (0)    | 0 (0)  | 1 (33.3) | 0 (0)  | 2 (66.7) | 0 (0)     | 0 (0)    | 0 (0)    | 0 (0)    | 0 (0)   | 72.8  | 8.9   | 62.5    | 78.2    |
| A + M5              | Co-blistered artesunate 50 mg and mefloquine 250 mg    | 3  | 0 (0)    | 0 (0)  | 0 (0)    | 0 (0)  | 2 (66.7) | 1 (33.3)  | 0 (0)    | 0 (0)    | 0 (0)    | 0 (0)   | 83.8  | 1.55  | 82.2    | 85.3    |
| Malarine adolescent | Co-blistered artesunate 50 mg and mefloquine 250 mg    | 1  | 0 (0)    | 0 (0)  | 0 (0)    | 0 (0)  | 0 (0)    | 0 (0)     | 1 (100)  | 0 (0)    | 0 (0)    | 0 (0)   | 96.3  | -     | -       | -       |
| Malarine adult      | Co-blistered artesunate 50 mg and mefloquine 250 mg    | 34 | 1 (2.9)  | 0 (0)  | 0 (0)    | 0 (0)  | 0 (0)    | 25 (73.5) | 4 (11.8) | 1 (2.9)  | 2 (5.9)  | 1 (2.9) | 93.4  | 12.71 | 40.6    | 122     |
| Malarine            | Co-blistered artesunate 50 mg and mefloquine 250 mg    | 4  | 0 (0)    | 0 (0)  | 0 (0)    | 0 (0)  | 0 (0)    | 2 (50.0)  | 2 (50.0) | 0 (0)    | 0 (0)    | 0 (0)   | 94.7  | 0.57  | 94.1    | 95.3    |
| AS (Bindinh Pharma) | Artesunate tablets (50 mg)                             | 7  | 0 (0)    | 0 (0)  | 0 (0)    | 0 (0)  | 5 (71.4) | 2 (28.6)  | 0 (0)    | 0 (0)    | 0 (0)    | 0 (0)   | 81.3  | 3.45  | 77.8    | 86.4    |
| AS (Canada Pharm)   | Artesunate tablets (50 mg)                             | 1  | 0 (0)    | 0 (0)  | 0 (0)    | 0 (0)  | 0 (0)    | 1 (100)   | 0 (0)    | 0 (0)    | 0 (0)    | 0 (0)   | 85.9  | -     | -       | -       |
| A + M (unknown)     | Co-blistered artesunate 50 mg and mefloquine 250 mg    | 8  | 1 (12.5) | 0 (0)  | 0 (0)    | 0 (0)  | 1 (12.5) | 6 (75.0)  | 0 (0)    | 0 (0)    | 0 (0)    | 0 (0)   | 82.1  | 16.3  | 43.2    | 93.6    |
| AS (unknown)        | Artesunate tablets (50 mg)                             | 3  | 0 (0)    | 0 (0)  | 0 (0)    | 0 (0)  | 1 (33.3) | 2 (66.7)  | 0 (0)    | 0 (0)    | 0 (0)    | 0 (0)   | 86.2  | 4.41  | 82.5    | 91.1    |
| ArtesunAT           | Artesunate tablets (50 mg)                             | 3  | 0 (0)    | 0 (0)  | 0 (0)    | 0 (0)  | 2 (66.7) | 1 (33.3)  | 0 (0)    | 0 (0)    | 0 (0)    | 0 (0)   | 86    | 4.92  | 82.9    | 91.7    |

API = active pharmaceutical ingredient; ACAs = artemisinin-containing antimalarials; MCs = mystery clients; SD = standard deviation.
